# Supplementary material for: Cooperative effects between π-hole triel and π-hole chalcogen bonds
Source: Royal Society of Chemistry journal article supplement (doi:10.1039/c8ra04106g), 2018-01-01
Supplement: c8ra04106g1.pdf [file c8ra04106g1.pdf]

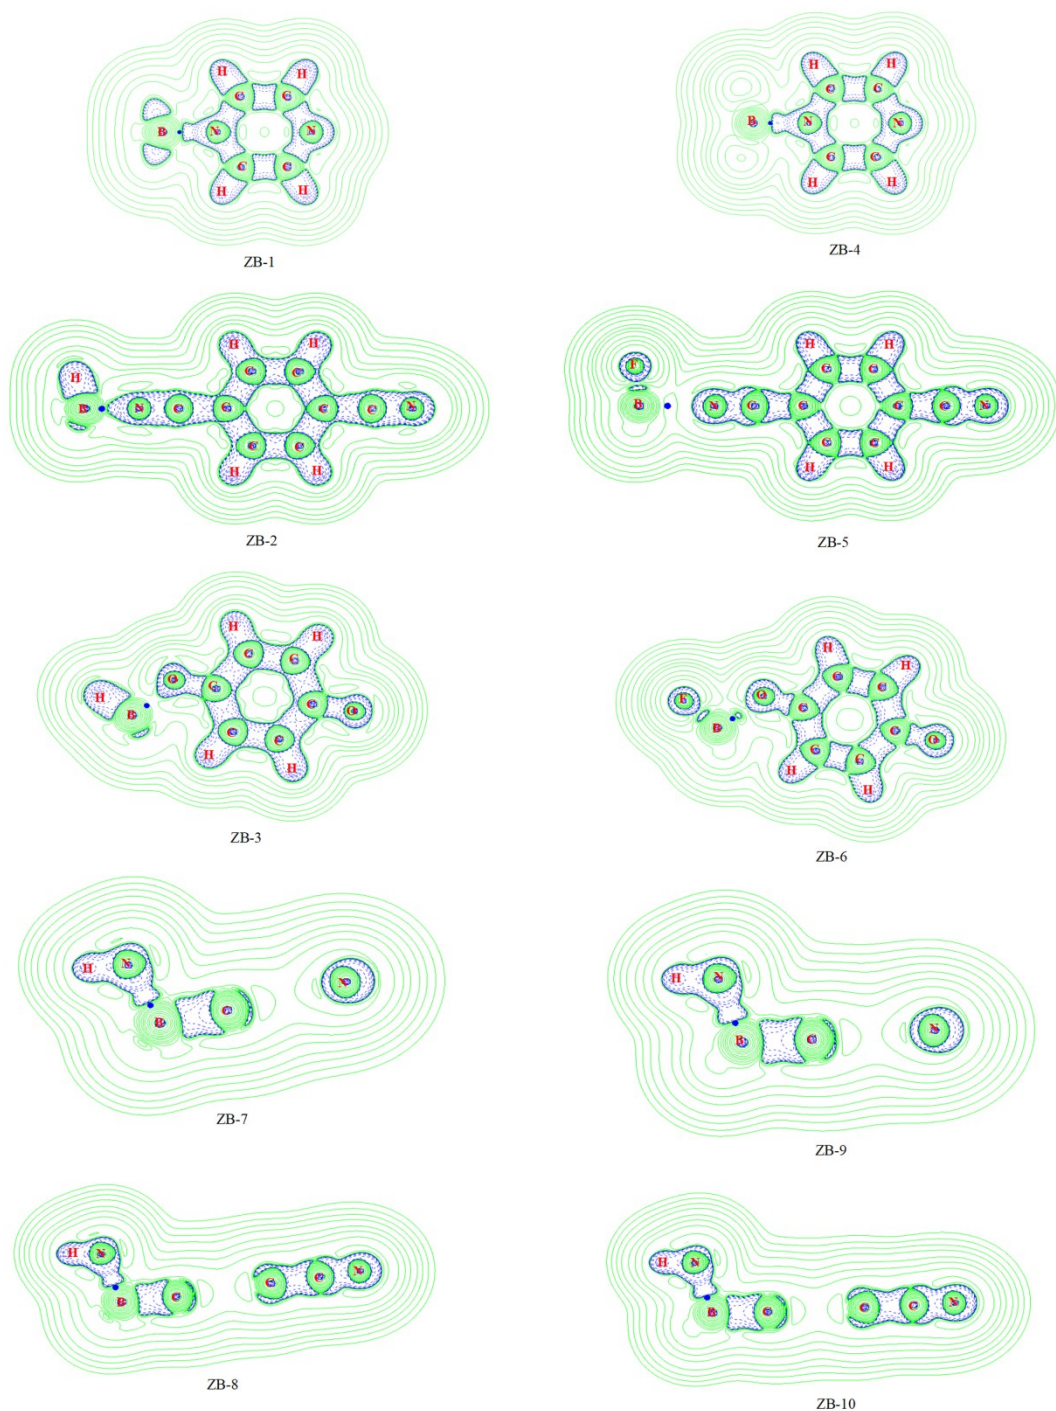

Fig. S1 The contour plots of  $\nabla^2\rho_{\text{BCP}}$  for the triel-bonded complexes. Green solid lines represent the region of  $\nabla^2\rho_{\text{BCP}} > 0$  and purple dashed lines highlight the area of  $\nabla^2\rho_{\text{BCP}} < 0$

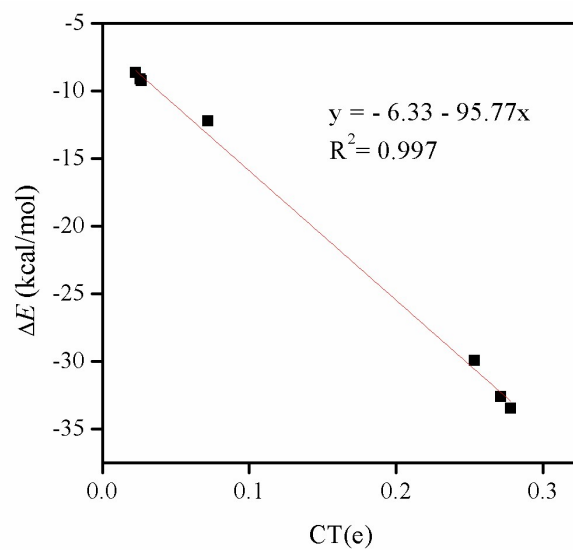

**Fig. S2** Relationship between interaction energy ( $\Delta E$ ) and charge transfer (CT) in the chalcogen-bonded complexes

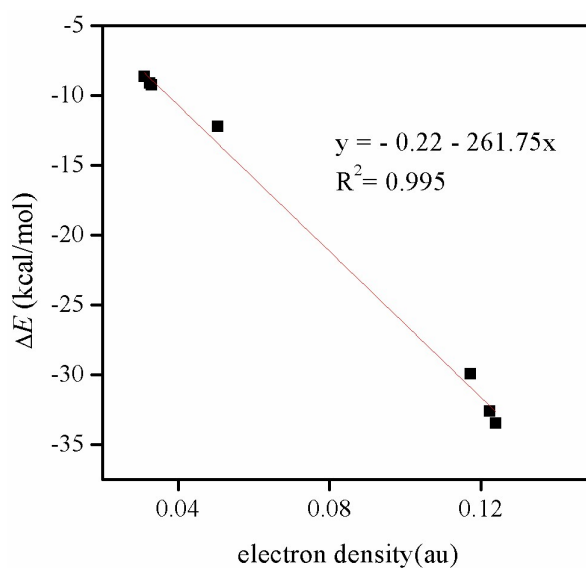

**Fig. S3** Relationship between interaction energy ( $\Delta E$ ) and energy density in the chalcogen-bonded complexes

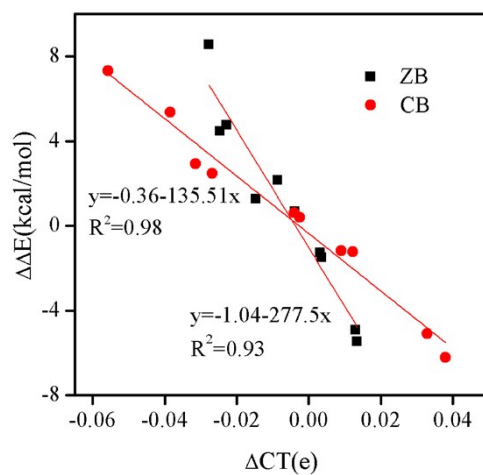

Fig. S4 Relationship between the change of interaction energy ( $\Delta\Delta E$ ) and change of charge transfer ( $\Delta CT$ ) of triel bond (ZB) and chalcogen bond (CB) in the triads relative to the dyads
